# Supplementary material for: Treatment completion for latent tuberculosis infection in Norway: a prospective cohort study
Source: BMC Infect Dis. 2018 Nov 19;18:587. doi: 10.1186/s12879-018-3468-z (PMC6245849; doi:10.1186/s12879-018-3468-z)
Supplement: Supplementary file 3 — a sensitivity analysis exploring the associations between treatment non-completion, and treatment support, origin, age and sex after imputation for missing values. (PDF 472 kb) [file 12879_2018_3468_MOESM3_ESM.pdf]

### Supplementary material, Additional file 3.

*Associations between treatment non-completion, treatment support, origin, age and sex after imputation for missing values (n=726)*

| Covariates                                                            | Univariable |       | Multivariable |       |       |             |
|-----------------------------------------------------------------------|-------------|-------|---------------|-------|-------|-------------|
|                                                                       | cOR         | P     | aOR           | SE    | P     | 95% CI      |
| <b>Origin</b>                                                         |             |       |               |       |       |             |
| Foreign-born                                                          | 1 (ref)     |       | 1 (ref)       |       |       |             |
| Norwegian-born                                                        | 2.1         | 0.015 | 0.8           | 0.358 | 0.667 | 0.36 – 1.94 |
| <b>Age</b>                                                            |             |       |               |       |       |             |
| ≤ 35                                                                  | 1 (ref)     |       | 1 (ref)       |       |       |             |
| > 35 years                                                            | 1.9         | 0.023 | 1.5           | 0.464 | 0.176 | 0.83 – 2.76 |
| <b>Sex</b>                                                            |             |       |               |       |       |             |
| Female                                                                | 1 (ref)     |       | 1 (ref)       |       |       |             |
| Male                                                                  | 0.5         | 0.017 | 0.6           | 0.165 | 0.063 | 0.35 – 1.03 |
| <b>Treatment support.</b> Model with interaction term for origin      |             |       |               |       |       |             |
| Effect of treatment support on treatment completion in foreign-born   |             |       |               |       |       |             |
| Self administered <sup>i</sup>                                        | 1 (ref)     |       | 1 (ref)       |       |       |             |
| DOT daily <sup>ii</sup>                                               | 0.2         | 0.004 | 0.3           | 0.139 | 0.011 | 0.10 – 0.74 |
| DOT weekly <sup>iii</sup>                                             | 0.4         | 0.012 | 0.5           | 0.167 | 0.033 | 0.22 – 0.94 |
| Effect of treatment support on treatment completion in Norwegian-born |             |       |               |       |       |             |
| Self administered <sup>i</sup>                                        | 1 (ref)     |       | 1 (ref)       |       |       |             |
| DOT daily <sup>ii</sup>                                               | 2.1         | 0.231 | 2.5           | 1.618 | 0.165 | 0.68 – 9.04 |
| DOT weekly <sup>iii</sup>                                             | 0.9         | 0.877 | 1.0           | 0.806 | 0.968 | 0.19 – 4.96 |

OR: Odds ratio, SE: standard error, DOT: Direct Observed Treatment for part of or the full treatment period

<sup>i</sup> Self-administered include those who managed their treatment themselves or were given weekly pill boxes

<sup>ii</sup> daily DOT include those who were administered daily treatment under direct observation

<sup>iii</sup> weekly DOT include those who were administered weekly rifapentine and isoniazid under direct observation
